# Supplementary material
Source: ML conference proceedings conference paper supplement (https://proceedings.neurips.cc/paper_files/paper/2009/hash/a666587afda6e89aec274a3657558a27-Abstract.html)
Supplement: Supplementary file [file a666587afda6e89aec274a3657558a27-Supplemental.zip]

---

# Supplemental Material of Regularized Distance Metric Learning: Theory and Algorithm

---

**Rong Jin<sup>1</sup>   Shijun Wang<sup>2</sup>   Yang Zhou<sup>1</sup>**

<sup>1</sup>Dept. of Computer Science & Engineering, Michigan State University, East Lansing, MI 48824

<sup>2</sup>Radiology and Imaging Sciences, National Institutes of Health, Bethesda, MD 20892

rongjin@cse.msu.edu   wangshi@cc.nih.gov   zhouyang@msu.edu

**Theorem 1.** *The optimal solution  $\lambda_t$  to the problem in (14) is expressed as*

$$\lambda_t = \begin{cases} \lambda & y_t = -1 \\ \min(\lambda, [(x_t - x'_t)^\top A_{t-1}^{-1}(x_t - x'_t)]^{-1}) & y_t = +1 \end{cases}$$

*Proof.* By using the Schur complement, this condition  $A_{t-1} - \lambda y_t (x_t - x'_t)(x_t - x'_t)^\top \succeq 0$  can be expressed as

$$\begin{pmatrix} A_{t-1} & x - x' \\ (x - x')^\top & 1/(\lambda y_t) \end{pmatrix} \succeq 0.$$

If we apply the Schur complement again on the above matrix, then it is equivalent to

$$1/(\lambda y_t) \geq (x - x')^\top A_{t-1}^{-1} (x - x').$$

When  $y_t = +1$ , we have

$$\lambda \leq \frac{1}{(x - x')^\top A_{t-1}^{-1} (x - x')}.$$

In order to keep an appropriate and stable learning speed, we prefer a pre-selected  $\lambda$  by imposing the above limitation through  $\min(\lambda, [(x_t - x'_t)^\top A_{t-1}^{-1}(x_t - x'_t)]^{-1})$ .

When  $y_t = -1$ , because the summation of two positive definite matrices is still a positive definite matrix, we simply choose  $\lambda_t = \lambda$ .

□
